# Supplementary material
Source: PubMed Central journal article supplement (PMC3462623)
Supplement: supp_tpc.112.099259_tpc099259SupplementalData.pdf [file supp_tpc.112.099259_tpc099259SupplementalData.pdf]

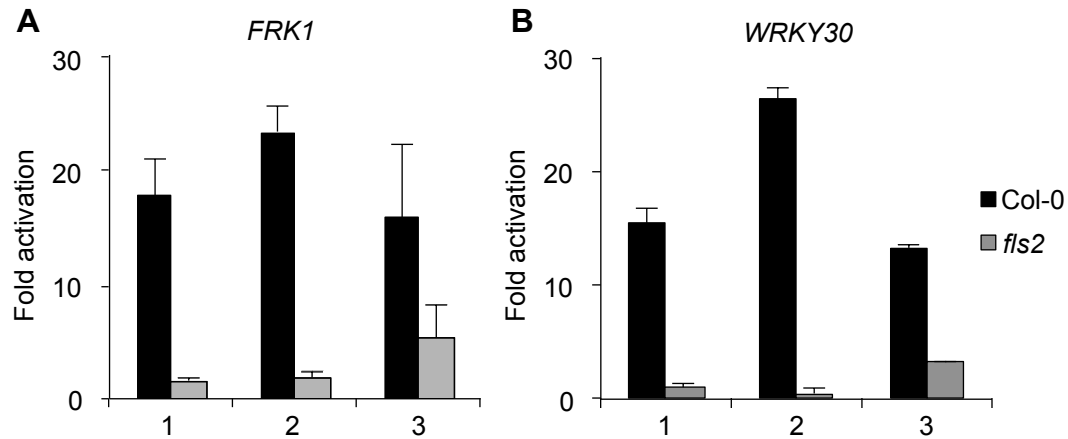

**Supplemental Figure 1.** Immune response marker gene activation with three independent batches of CLV3p preparations.

Immune response marker genes, *FRK1* (A) and *WRKY30* (B), were activated by three different batches of CLV3p. Number 1 is the 12 aa CLV3p (RTVP<sub>h</sub>SGP<sub>h</sub>DPLHH; P<sub>h</sub> indicates hydroxyproline) ordered from GenScript. Number 2 and 3 peptides containing an additional tyrosine residue at the N-terminus (YRTVP<sub>h</sub>SGP<sub>h</sub>DPLHH) were ordered from Phoenix Pharmaceuticals, Inc. Although the length of peptides 2 and 3 is 13 aa, the activity of Tyr-MCLV3p is the same as the 12 aa MCLV3p. Seven-day old seedlings of Col-0 and the *fls2* mutant grown in liquid culture were analyzed by qRT-PCR after treatment with 20  $\mu$ M peptides for 1 h. Error bars indicate S.D. ( $n = 3$ ).

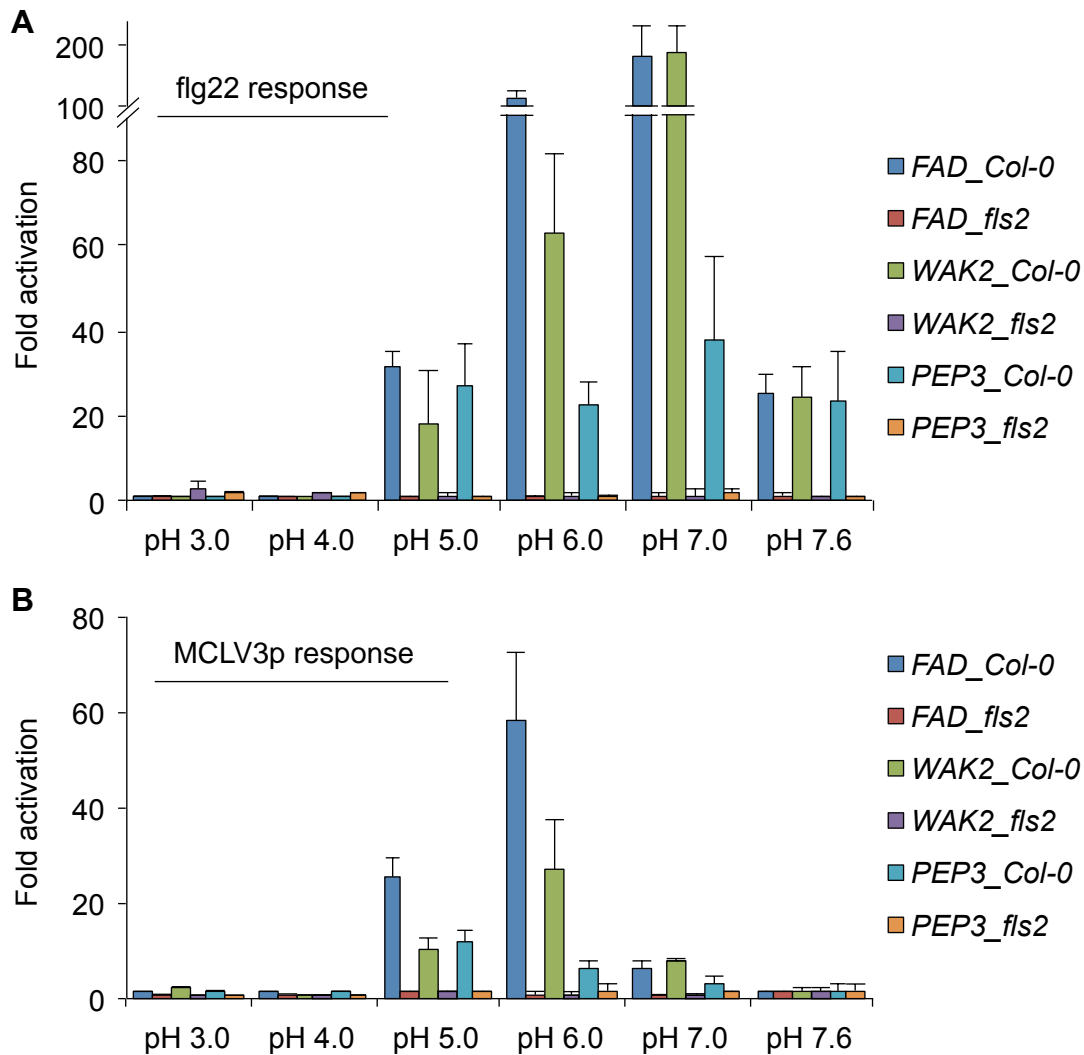

**Supplemental Figure 2.** Flg22 and MCLV3p exhibit distinct pH optima in immune response marker gene activation.

**(A)** Immune response marker genes, *FAD* (*At1g26380*), *WAK2* (*At1g79680*) and *PEP3*, were activated by 1 nM flg22 in Col-0 and *fls2* seedlings.

**(B)** Immune response marker genes, *FAD*, *WAK2* and *PEP3*, were activated by 1  $\mu$ M MCLV3p in Col-0 and *fls2* seedlings.

Seven day-old seedlings grown in liquid culture were treated with 1 nM flg22 **(A)** or 1  $\mu$ M MCLV3p **(B)** for 1 h in various pH ranges. The expression of each gene was normalized by *ACT2*. Relative activation fold was normalized by the control level without peptide treatment in each pH. Error bars indicate S.D. ( $n = 3$ ).

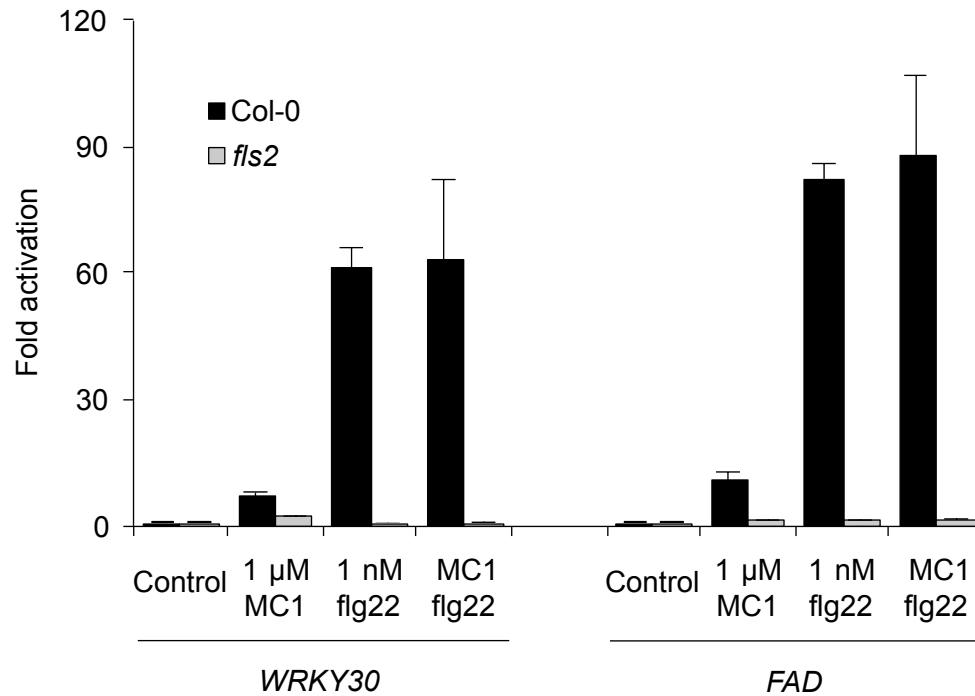

**Supplemental Figure 3.** MCLV3p did not block immune response marker gene activation by flg22 at pH 7.0.

Immune response marker genes, *WRKY30* (left) and *FAD* (right), were activated by flg22 in the presence of MCLV3p. Seven day-old seedlings of Col-0 and *fls2* grown in liquid culture were treated with 1 nM flg22, 1  $\mu$ M MCLV3p, or both 1 nM flg22 and 1  $\mu$ M MCLV3p for 1 h at pH 7.0. The expression of each gene was normalized by *ATC2*. Error bars indicate S.D. ( $n = 3$ ).

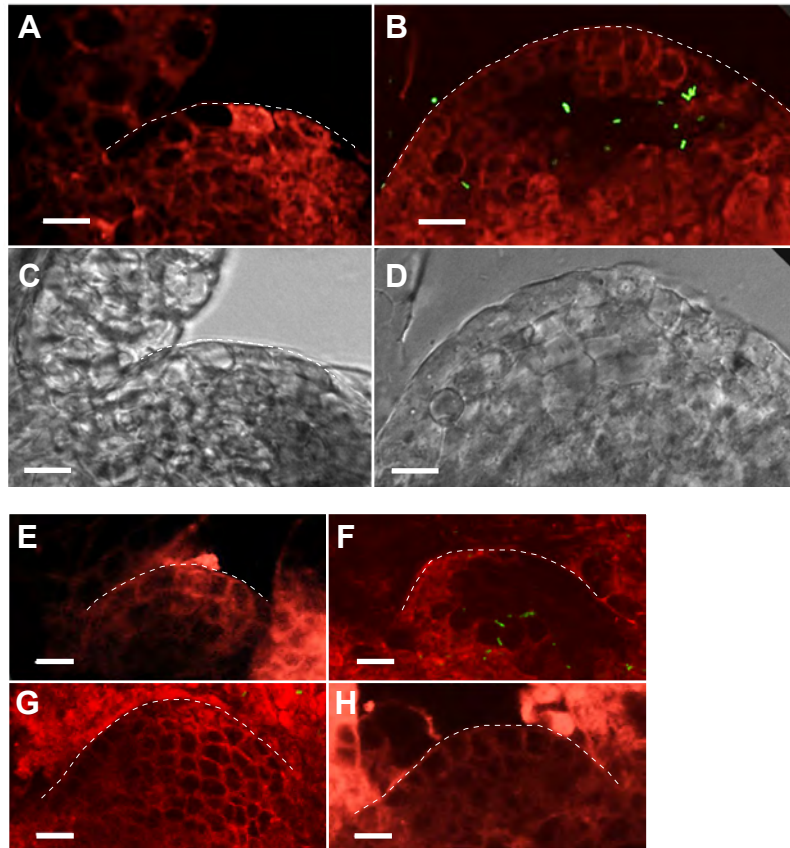

**Supplemental Figure 4.** *Pst* DC3000-GFP invades inside the SAM of *clv3* and *fls2* seedlings.

Bacterial infection analyses in the SAM of *Ler* (**A**, **E**), *clv3-2* (**B**), *fls2-24* (**F**), *clv1-1* (**G**) and *clv2-1* (**H**). *P. syringae* pv. *tomato* DC3000-GFP was co-cultivated grown in liquid medium with seedlings for 4 days. *Pst* DC3000-GFP (green) and the cell membrane (red; stained by FM4-64 dye) were visualized using a confocal laser-scanning microscope. (**C**) and (**D**) are the bright field pictures of *Ler* (**A**) and *clv3* (**B**). Scale bars in (**A**) to (**H**) = 10  $\mu$ m.

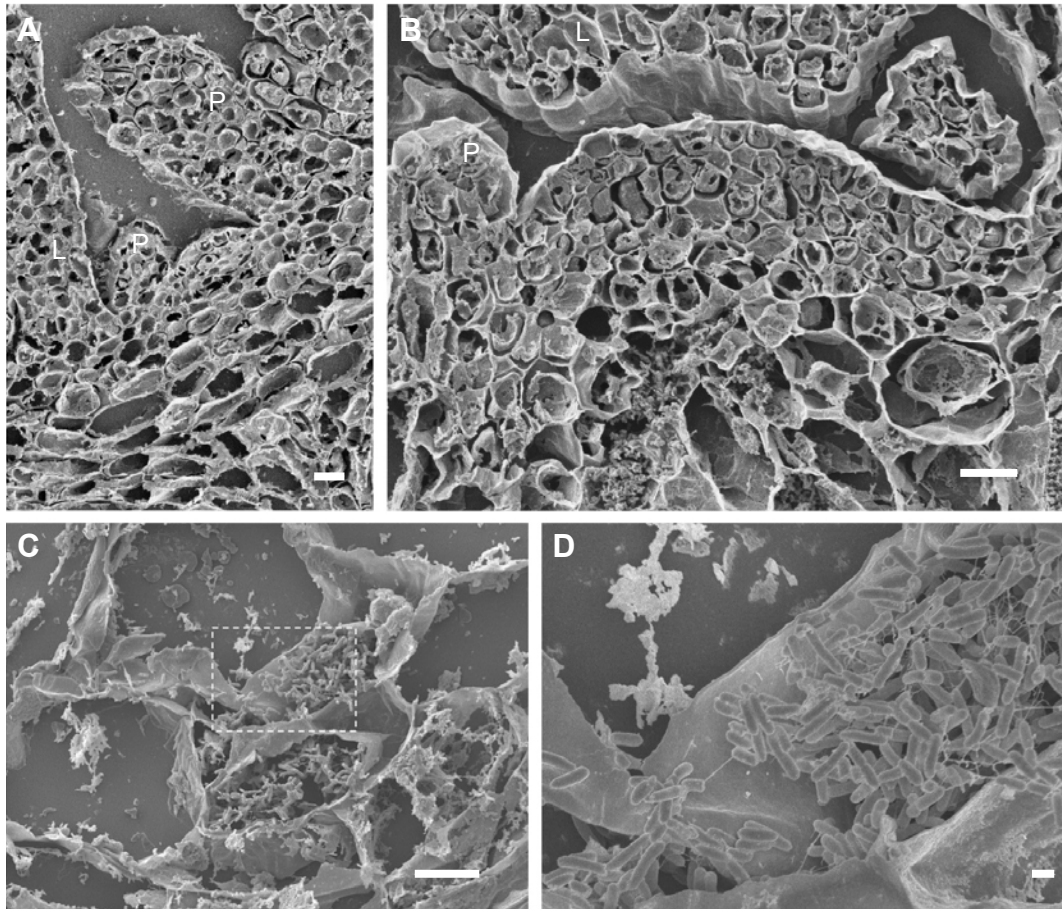

**Supplemental Figure 5.** Analysis of *Pst* DC3000 infection in the SAM regions of seedlings grown in liquid culture by SEM.

**(A)** and **(B)** are non-cropped pictures of Figures 7A and 7B. Non-cropped pictures of **(A)** and **(B)** show the SAM and flanking leaf primordia (P) and young leaves (L). Scale bars of **(A)** and **(B)** = 10  $\mu$ m.

**(C)** Bacterial colonization in plant cells by SEM analysis. Scale bar = 10  $\mu$ m.

**(D)** A magnified image of selected region (white dot box) in **(C)** showing bacterial colonization. Scale bar = 1  $\mu$ m.

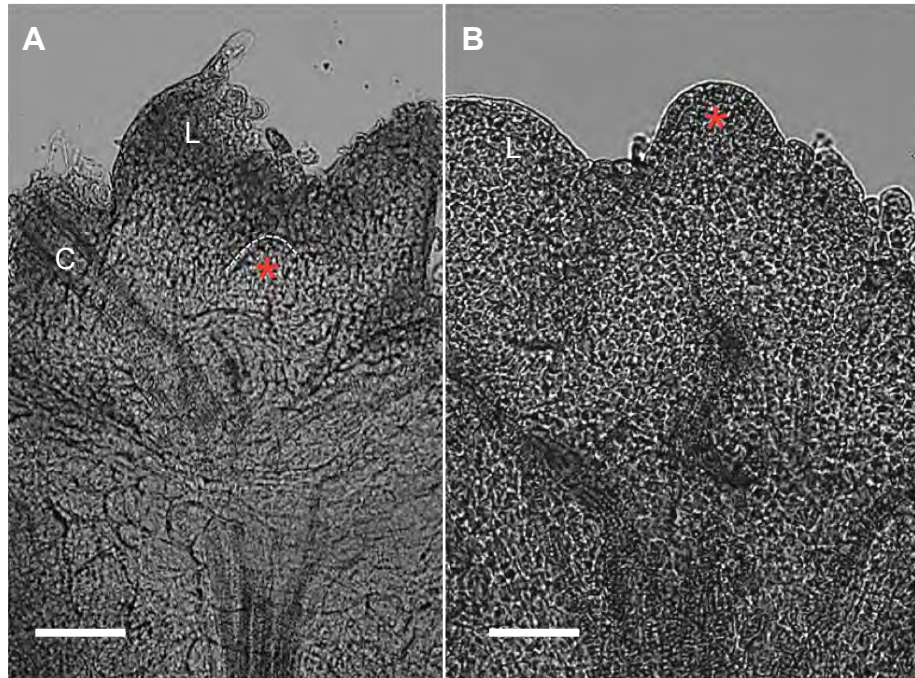

**Supplemental Figure 6.** Visible SAM in *Arabidopsis* seedlings.

The SAM of *Ler* (**A**) and *clv3-2* (**B**) seedlings grown in liquid culture are shown. Most tissues from cotyledons and early true leaves were removed. The SAM (white dot line) of *Ler* and *clv3-2* is surrounded by the remaining tissues from cotyledons (C) and young leaves (L). Red asterisks indicate the SAM region. Scale bars in (**A**) and (**B**) = 50  $\mu\text{m}$ .

**Supplemental Table 1.** Primers used for qRT-PCR

| <b>Name</b>                           | <b>Forward primer</b>   | <b>Reverse primer</b>     |
|---------------------------------------|-------------------------|---------------------------|
| <i>FRK1</i><br>( <i>At2g19190</i> )   | ATCTTCGCTTGGAGCTTCTC    | TGCAGCGCAAGGACTAGAG       |
| <i>WRKY30</i><br>( <i>At5g24110</i> ) | GCAGCTTGAGAGCAAGAATG    | AGCCAAATTTCCAAGAGGAT      |
| <i>PEP3</i><br>( <i>At5g64905</i> )   | TCCGGTCTCGAAAGTTCATC    | CTCATCTTCCTCGCTGTGTG      |
| <i>ACT2</i><br>( <i>At3g18780</i> )   | TCCCTCAGCACATTCCAGCAGAT | AACGATTCCTGGACCTGCCTCATC  |
| <i>DcGFP</i>                          | TGGAAGCGTTCAACTAGCAG    | AAAGGGCAGATTGTGTGGAC      |
| <i>FAD</i><br>( <i>At1g26380</i> )    | ATCAAGGGTGAGGAGAGACG    | GAGCATACAATCCAATATTTCAACC |
| <i>WAK2</i><br>( <i>At1g79680</i> )   | AGGGAAGGAAACGACCAAGT    | GCGACGAAGATGTTGTAGCA      |
